# Supplementary material for: Independent Polled Mutations Leading to Complex Gene Expression Differences in Cattle
Source: PubMed Central journal article supplement (PMC3966897; doi:10.1371/journal.pone.0093435), 2014-03-26
Supplement: pone.0093435.s011.pdf [file pone.0093435.s011.pdf]

**Table S2:** Sequence variants of polled associated 932 kb haplotype in Holstein. Animals carrying the polled associated *indel* found in Simmental are not included. The remaining associated variants are highlighted in grey and the excluded variants shown in red.

| UMD3.1 position | variant  | reference allele | variant allele | ref/ref polled | ref/var polled | var/var polled | ref/ref horned | ref/var horned |
|-----------------|----------|------------------|----------------|----------------|----------------|----------------|----------------|----------------|
| 1'583'414°      | SNP      | A                | G              |                | 84             | 4              | 204            |                |
| 1'584'650       | SNP      | C                | T              |                | 1              | 2              | 55             | 1              |
| 1'587'758       | SNP      | C                | T              |                | 76             | 4              | 200            | 1              |
| 1'596'777°      | SNP      | G                | T              |                | 85             | 4              | 390            |                |
| 1'603'747°      | SNP      | C                | T              |                | 87             | 4              | 426            |                |
| 1'606'620°      | SNP      | C                | T              |                | 83             | 4              | 415            |                |
| 1'607'675°      | SNP      | G                | A              |                |                | 3*             | 41             |                |
| 1'618'261°      | SNP      | T                | C              |                |                | 3*             | 43             |                |
| 1'623'157°      | SNP      | G                | A              |                | 11             | 2              | 77             |                |
| 1'623'573       | SNP      | G                | C              |                | 77             | 4              | 368            |                |
| 1'624'279°      | SNP      | C                | T              |                | 82             | 2              | 417            |                |
| 1'624'522°      | SNP      | T                | G              |                | 85             | 2              | 411            |                |
| 1'624'555°      | SNP      | T                | C              |                | 81             | 1              | 408            |                |
| 1'626'030°      | SNP      | T                | C              |                | 84             | 4              | 425            |                |
| 1'626'065°      | SNP      | G                | C              |                | 84             | 4              | 421            |                |
| 1'628'090°      | SNP      | A                | G              |                | 60             | 4              | 384            |                |
| 1'631'299°      | SNP      | A                | G              |                | 86             | 4              | 424            |                |
| 1'631'667°      | SNP      | C                | T              |                | 87             | 4              | 429            |                |
| 1'631'762°      | SNP      | G                | A              |                | 87             | 4              | 429            |                |
| 1'631'895°      | SNP      | T                | C              |                | 87             | 4              | 427            |                |
| 1'633'226°      | SNP      | T                | A              |                | 77             | 4              | 420            |                |
| 1'633'690°      | SNP      | C                | T              |                | 79             | 4              | 422            |                |
| 1'635'514°      | SNP      | G                | C              |                | 76             | 4              | 414            |                |
| 1'639'632°      | SNP      | A                | G              |                | 82             | 3              | 396            |                |
| 1'640'658°      | SNP      | G                | T              |                | 86             | 4              | 432            |                |
| 1'640'815°      | SNP      | T                | C              |                | 85             | 3              | 420            |                |
| 1642525° **     | SNP      | T                | A              |                |                | 1              | 33             |                |
| 1'645'083°      | SNP      | G                | T              |                | 80             | 4              | 426            |                |
| 1'645'296°      | deletion | AT               | A              |                | 76             | 4              | 422            |                |
| 1645301°        | SNP      | T                | A              |                | 75             | 4              | 423            |                |
| 1'649'163 +     | InDel    | CGCATCA          | TTCTCAGAATAG   |                | 85             | 3              | 415            |                |
| 1'651'491°      | SNP      | C                | T              | 6              | 12             | 3              | 203            |                |
| 1'654'405 +     | SNP      | G                | A              |                | 87             | 4              | 424            |                |
| 1'655'463 +     | SNP      | C                | T              |                | 86             | 4              | 429            |                |
| 1'672'807       | SNP      | G                | A              |                | 2              | 2              | 216            | 1              |
| 1'676'520       | SNP      | C                | T              |                | 19             | 3              | 407            | 1              |
| 1'679'832       | SNP      | C                | T              |                | 2              | 3              | 133            | 1              |
| 1'680'646       | SNP      | T                | C              |                | 80             | 6              | 221            | 1              |
| 1'684'055°      | SNP      | G                | C              |                | 85             | 4              | 416            |                |
| 1'764'239°      | SNP      | T                | C              |                | 85             | 4              | 409            |                |
| 1'768'587 +     | SNP      | C                | A              | 4***           | 152            | 25             | 443            |                |
| 1'855'898°      | SNP      | G                | A              |                | 87             | 4              | 408            |                |
| 1'909'354+      | 80kbDup  |                  |                |                | 105****        |                | 430            |                |
| 2'028'953°      | SNP      | C                | G              |                |                | 1              | 33             |                |
| 2'248'958       | SNP      | G                | A              |                |                | 1              | 33             |                |
| 2'255'019       | SNP      | C                | T              |                |                | 1              | 33             |                |
| 2'261'830       | SNP      | T                | C              |                |                | 1              | 33             |                |
| 2'263'363       | SNP      | T                | C              |                |                | 1              | 33             |                |
| 2'267'616       | deletion | CT               | C              |                |                | 1              | 33             |                |
| 2'268'463       | SNP      | G                | A              |                |                | 1              | 33             |                |
| 2'269'541       | SNP      | T                | C              |                |                | 1              | 33             |                |
| 2'270'224       | SNP      | C                | T              |                |                | 1              | 33             |                |
| 2'271'484       | SNP      | C                | T              |                |                | 1              | 33             |                |
| 2'274'411       | SNP      | C                | T              |                |                | 1              | 33             |                |
| 2'274'700       | SNP      | T                | G              |                |                | 1              | 33             |                |
| 2'275'244       | SNP      | G                | A              |                |                | 1              | 33             |                |
| 2'275'575       | SNP      | G                | A              |                |                | 1              | 33             |                |
| 2'275'606       | SNP      | C                | G              |                |                | 1              | 33             |                |
| 2'275'689       | SNP      | G                | A              |                |                | 1              | 33             |                |
| 2'278'133       | SNP      | A                | C              |                |                | 1              | 33             |                |
| 2'279'787       | SNP      | G                | T              |                |                | 1              | 33             |                |
| 2'279'861       | SNP      | A                | G              |                |                | 1              | 33             |                |

| UMD3.1 position | variant   | reference allele | variant allele | ref/ref polled | ref/var polled | var/var polled | ref/ref horned | ref/var horned |
|-----------------|-----------|------------------|----------------|----------------|----------------|----------------|----------------|----------------|
| 2'279'921       | SNP       | T                | C              |                |                | 1              | 32             |                |
| 2'279'996       | SNP       | G                | A              |                |                | 1              | 32             |                |
| 2'280'020       | SNP       | A                | G              |                |                | 1              | 32             |                |
| 2'280'142       | SNP       | C                | T              |                |                | 1              | 32             |                |
| 2'280'168       | SNP       | G                | A              |                |                | 1              | 32             |                |
| 2'280'378       | SNP       | T                | C              |                |                | 1              | 32             |                |
| 2'280'407       | SNP       | C                | T              |                |                | 1              | 33             |                |
| 2'280'428       | InDel     | CCT              | CTCTAC         |                |                | 1              | 32             |                |
| 2'280'522       | SNP       | T                | C              |                |                | 1              | 33             |                |
| 2'280'577       | SNP       | C                | G              |                |                | 1              | 33             |                |
| 2'280'612       | SNP       | C                | T              |                |                | 1              | 33             |                |
| 2'280'642       | SNP       | T                | C              |                |                | 1              | 33             |                |
| 2'280'673       | SNP       | C                | A              |                |                | 1              | 33             |                |
| 2'280'683       | SNP       | A                | G              |                |                | 1              | 33             |                |
| 2'280'702       | SNP       | C                | T              |                |                | 1              | 33             |                |
| 2'280'862       | SNP       | A                | G              |                |                | 1              | 33             |                |
| 2'280'879       | SNP       | A                | G              |                |                | 1              | 33             |                |
| 2'280'916       | SNP       | T                | C              |                |                | 1              | 33             |                |
| 2'280'926       | SNP       | G                | C              |                |                | 1              | 33             |                |
| 2'281'031       | SNP       | G                | A              |                |                | 1              | 33             |                |
| 2'281'058       | SNP       | C                | G              |                |                | 1              | 33             |                |
| 2'281'154       | SNP       | A                | T              |                |                | 1              | 33             |                |
| 2'281'262       | SNP       | T                | C              |                |                | 1              | 33             |                |
| 2'281'270       | SNP       | T                | A              |                |                | 1              | 33             |                |
| 2'281'440       | SNP       | A                | T              |                |                | 1              | 33             |                |
| 2'281'560       | SNP       | A                | G              |                |                | 1              | 33             |                |
| 2'281'590       | SNP       | T                | C              |                |                | 1              | 33             |                |
| 2'281'635       | SNP       | C                | T              |                |                | 1              | 33             |                |
| 2'282'082       | SNP       | A                | G              |                |                | 1              | 33             |                |
| 2'282'132       | SNP       | G                | A              |                |                | 1              | 33             |                |
| 2'282'187       | SNP       | T                | C              |                |                | 1              | 33             |                |
| 2'282'194       | SNP       | A                | T              |                |                | 1              | 33             |                |
| 2'282'315       | SNP       | A                | G              |                |                | 1              | 33             |                |
| 2'282'521       | SNP       | T                | C              |                |                | 1              | 33             |                |
| 2'282'761       | SNP       | A                | G              |                |                | 1              | 33             |                |
| 2'283'214       | SNP       | C                | T              |                |                | 1              | 33             |                |
| 2'283'224       | SNP       | G                | A              |                |                | 1              | 33             |                |
| 2'283'237       | SNP       | C                | G              |                |                | 1              | 33             |                |
| 2'283'539       | SNP       | G                | A              |                |                | 1              | 33             |                |
| 2'283'965       | SNP       | G                | A              |                |                | 1              | 33             |                |
| 2'283'992       | SNP       | C                | A              |                |                | 1              | 33             |                |
| 2'284'002       | SNP       | C                | T              |                |                | 1              | 33             |                |
| 2'284'720       | SNP       | C                | G              |                |                | 1              | 33             |                |
| 2'284'769       | SNP       | T                | C              |                |                | 1              | 33             |                |
| 2'285'147       | insertion | G                | GT             |                |                | 1              | 33             |                |
| 2'285'345       | SNP       | G                | A              |                |                | 1              | 33             |                |
| 2'285'383       | SNP       | G                | A              |                |                | 1              | 33             |                |
| 2'286'301       | SNP       | T                | G              |                |                | 1              | 33             |                |
| 2'286'353       | SNP       | G                | A              |                |                | 1              | 33             |                |
| 2'286'400       | SNP       | T                | G              |                |                | 1              | 33             |                |
| 2'286'504       | SNP       | C                | G              |                |                | 1              | 33             |                |
| 2'286'523       | SNP       | C                | A              |                |                | 1              | 33             |                |
| 2'286'592       | SNP       | T                | C              |                |                | 1              | 33             |                |
| 2'286'604       | SNP       | G                | A              |                |                | 1              | 33             |                |
| 2'286'606       | SNP       | G                | A              |                |                | 1              | 33             |                |
| 2'286'988       | SNP       | A                | G              |                |                | 1              | 33             |                |
| 2'287'210       | SNP       | C                | T              |                |                | 1              | 33             |                |
| 2'287'370       | SNP       | A                | G              |                |                | 1              | 33             |                |
| 2'287'448       | SNP       | C                | G              |                |                | 1              | 33             |                |
| 2'287'529       | insertion | A                | AT             |                |                | 1              | 33             |                |
| 2'287'596       | insertion | C                | CT             |                |                | 1              | 33             |                |
| 2'287'746       | SNP       | T                | C              |                |                | 1              | 33             |                |
| 2'287'757       | SNP       | C                | T              |                |                | 1              | 33             |                |
| 2'287'765       | SNP       | T                | C              |                |                | 1              | 33             |                |
| 2'287'798       | SNP       | A                | G              |                |                | 1              | 33             |                |
| 2'287'996       | SNP       | G                | C              |                |                | 1              | 33             |                |
| 2'288'467       | SNP       | A                | G              |                |                | 1              | 32             |                |

| UMD3.1 position | variant   | reference allele           | variant allele | ref/ref polled | ref/var polled | var/var polled | ref/ref horned | ref/var horned |
|-----------------|-----------|----------------------------|----------------|----------------|----------------|----------------|----------------|----------------|
| 2'288'990       | SNP       | A                          | G              |                |                | 1              | 32             |                |
| 2'289'042       | SNP       | A                          | G              |                |                | 1              | 33             |                |
| 2'289'346       | SNP       | G                          | A              |                |                | 1              | 33             |                |
| 2'289'458       | SNP       | C                          | T              |                |                | 1              | 32             |                |
| 2'289'716       | SNP       | C                          | T              |                |                | 1              | 33             |                |
| 2'292'082       | insertion | C                          | CACCT          |                |                | 1              | 33             |                |
| 2'292'239       | SNP       | G                          | A              |                |                | 1              | 33             |                |
| 2'292'304       | SNP       | G                          | A              |                |                | 1              | 33             |                |
| 2'293'266       | SNP       | T                          | C              |                |                | 1              | 33             |                |
| 2'293'846       | SNP       | G                          | A              |                |                | 1              | 33             |                |
| 2'293'867       | SNP       | C                          | A              |                |                | 1              | 33             |                |
| 2'293'870       | SNP       | T                          | C              |                |                | 1              | 33             |                |
| 2'294'082       | SNP       | G                          | C              |                |                | 1              | 33             |                |
| 2'294'184       | SNP       | C                          | T              |                |                | 1              | 33             |                |
| 2'294'641       | SNP       | G                          | T              |                |                | 1              | 33             |                |
| 2'294'647       | SNP       | T                          | C              |                |                | 1              | 33             |                |
| 2'294'824       | SNP       | G                          | A              |                |                | 1              | 33             |                |
| 2'294'855       | SNP       | C                          | T              |                |                | 1              | 33             |                |
| 2'295'121       | SNP       | C                          | G              |                |                | 1              | 33             |                |
| 2'295'487       | SNP       | G                          | A              |                |                | 1              | 33             |                |
| 2'295'951       | SNP       | G                          | A              |                |                | 1              | 32             |                |
| 2'297'070       | SNP       | C                          | T              |                |                | 1              | 33             |                |
| 2'297'597       | SNP       | T                          | A              |                |                | 1              | 33             |                |
| 2'298'042       | SNP       | A                          | G              |                |                | 1              | 33             |                |
| 2'298'175       | SNP       | G                          | A              |                |                | 1              | 33             |                |
| 2'298'226       | SNP       | C                          | A              |                |                | 1              | 33             |                |
| 2'299'551       | SNP       | A                          | G              |                |                | 1              | 32             |                |
| 2'299'669       | SNP       | C                          | G              |                |                | 1              | 33             |                |
| 2'299'800       | SNP       | C                          | T              |                |                | 1              | 33             |                |
| 2'299'901       | SNP       | A                          | G              |                |                | 1              | 33             |                |
| 2'300'316       | SNP       | A                          | G              |                |                | 1              | 33             |                |
| 2'300'391       | deletion  | TTAACTCACTGACAGTGAGTCGACAG | T              |                |                | 1              | 33             |                |
| 2'300'451       | SNP       | C                          | T              |                |                | 1              | 33             |                |
| 2'300'502       | SNP       | A                          | G              |                |                | 1              | 33             |                |
| 2'300'761       | SNP       | G                          | A              |                |                | 1              | 33             |                |
| 2'300'868       | SNP       | C                          | T              |                |                | 1              | 33             |                |
| 2'300'871       | SNP       | G                          | A              |                |                | 1              | 33             |                |
| 2'300'897       | SNP       | C                          | T              |                |                | 1              | 33             |                |
| 2'300'924       | SNP       | G                          | A              |                |                | 1              | 33             |                |
| 2'301'003       | SNP       | G                          | A              |                |                | 1              | 33             |                |
| 2'301'036       | SNP       | T                          | C              |                |                | 1              | 33             |                |
| 2'301'086       | SNP       | T                          | C              |                |                | 1              | 33             |                |
| 2'301'104       | SNP       | T                          | A              |                |                | 1              | 33             |                |
| 2'301'170       | SNP       | A                          | G              |                |                | 1              | 33             |                |
| 2'301'257       | SNP       | T                          | C              |                |                | 1              | 33             |                |
| 2'301'276       | SNP       | A                          | G              |                |                | 1              | 33             |                |
| 2'301'300       | SNP       | A                          | G              |                |                | 1              | 33             |                |
| 2'301'327       | SNP       | T                          | A              |                |                | 1              | 33             |                |
| 2'301'358       | SNP       | G                          | A              |                |                | 1              | 33             |                |
| 2'301'483       | SNP       | A                          | G              |                |                | 1              | 33             |                |
| 2'301'520       | deletion  | AGAGAGAGC                  | A              |                |                | 1              | 33             |                |
| 2'301'538       | SNP       | T                          | C              |                |                | 1              | 33             |                |
| 2'301'708       | SNP       | G                          | A              |                |                | 1              | 32             |                |
| 2'306'127       | SNP       | G                          | A              |                |                | 1              | 33             |                |
| 2'306'341       | SNP       | G                          | A              |                |                | 1              | 31             |                |
| 2'331'321       | SNP       | G                          | A              |                |                | 1              | 33             |                |
| 2'335'134       | insertion | A                          | AT             |                |                | 1              | 33             |                |
| 2'336'578       | SNP       | T                          | G              |                |                | 1              | 33             |                |
| 2'343'920       | SNP       | G                          | A              |                |                | 1              | 33             |                |
| 2'354'603       | SNP       | T                          | A              |                |                | 1              | 33             |                |
| 2'356'950       | SNP       | T                          | C              |                |                | 1              | 33             |                |
| 2'381'155°      | SNP       | T                          | G              |                |                | 1              | 33             |                |

\* Variants were excluded because obligate heterozygous Pp polled animals carried two copies of the variant allele.

\*\* Genotyping of additional animals for this variant was technically impossible.

\*\*\* One Simmental with polledness of unknown origin, two Limpurger with Scurs probably de novo mutation and one polled yak.

\*\*\*\* Differentiation between the heterozygous (ref/var) and homozygous (var/var) genotype not performed.

° Variants identified and ruled out by Allais-Bonnet et al. [3]

+ Variants identified by Allais-Bonnet et al. [3]
